# Supplementary material
Source: PubMed Central journal article supplement (PMC8945587)
Supplement: advancesADV2021004394C-suppl1.pdf [file advancesADV2021004394C-suppl1.pdf]

# Supplement 1: Membership of the Guideline Panel and the Systematic Review Team

## ASH Guideline Panel on Stem Cell Transplantation for Sickle Cell Disease

| Name                      | Role, Area of Expertise                                          |
|---------------------------|------------------------------------------------------------------|
| John Tisdale, MD          | Clinical Co-Chair, hematology, stem cell transplant for SCD      |
| Joerg Meerpohl, MD        | Methodology Co-Chair, methodology, pediatric hematology/oncology |
| Françoise Bernaudin, MD   | Hematology, stem cell transplant for SCD                         |
| Javier Bolaños-Meade, MD  | Hematology/oncology, stem cell transplant for SCD                |
| Courtney Fitzhugh, MD     | Hematology, stem cell transplant for SCD                         |
| Jane Hankins, MD, MS      | Hematology                                                       |
| Julie Kanter, MD          | Hematology                                                       |
| Julie Panepinto, MD, MSPH | Pediatric hematology                                             |
| Damiano Rondelli, MD      | Hematology/oncology, stem cell transplant for SCD                |
| Shalini Shenoy, MD        | Pediatric hematology/oncology, stem cell transplant for SCD      |
| John Wagner, MD           | Pediatric hematology/oncology, stem cell transplant              |
| Mark Walters, MD          | Pediatric hematology/oncology, stem cell transplant              |
| Joi Williamson *          | Patient Representative                                           |
| Teonna Woolford           | Patient Representative                                           |

\* Stopped participating on June 27, 2019.

## Researchers From the Mayo Evidence-Based Practice Center Who Contributed to Evidence Syntheses

| Name             | Role                   |
|------------------|------------------------|
| M. Hassan Murad  | Principal Investigator |
| Jehad Almasri    | Research Fellow        |
| Bradley Beuschel | Analyst                |
| Lubna Daraz      | Research Fellow        |
| Larry Prokop     | Librarian              |
| Zhen Wang        | Consultant             |
